# Supplementary material for: Reciprocal regulation of ARPP-16 by PKA and MAST3 kinases provides a cAMP-regulated switch in protein phosphatase 2A inhibition
Source: eLife journal article supplement (doi:10.7554/elife.24998), 2017-06-14
Supplement: supp [file elife-24998-supp-v1.zip]

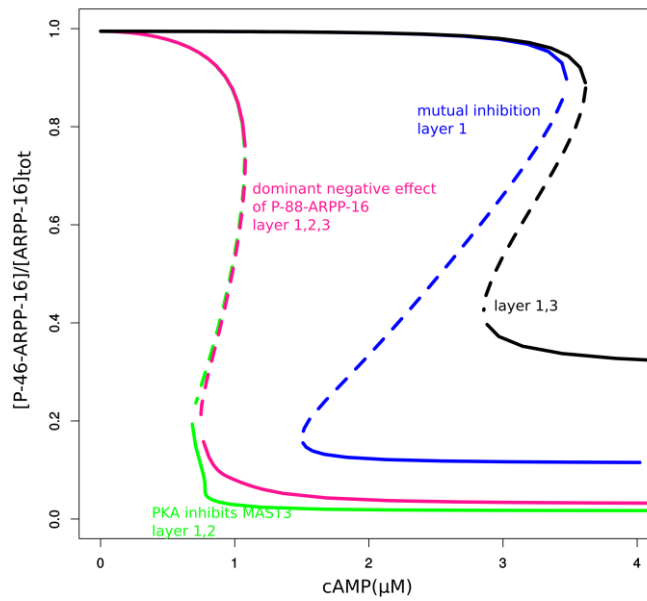

**Figure 3 – Figure Supplement 1:**

Bifurcation diagrams of P-S46-ARPP-16 under mutual inhibitions (blue, layer 1), PKA inhibition of MAST3 (green, this effect is in addition to previous effect, layers 1+2), P-S88-ARPP-16 dominant negative effect on P-S46-ARPP-16 inhibiting PP2A (pink, this effect is in addition to previous effects, layers 1+2+3), and mutual inhibition with P-S88-ARPP-16 dominant negative effect (black, layers 1+3).
