# Supplementary material for: Reciprocal regulation of ARPP-16 by PKA and MAST3 kinases provides a cAMP-regulated switch in protein phosphatase 2A inhibition
Source: eLife journal article supplement (doi:10.7554/elife.24998), 2017-06-14
Supplement: supp [file elife-24998-supp-v1.zip]

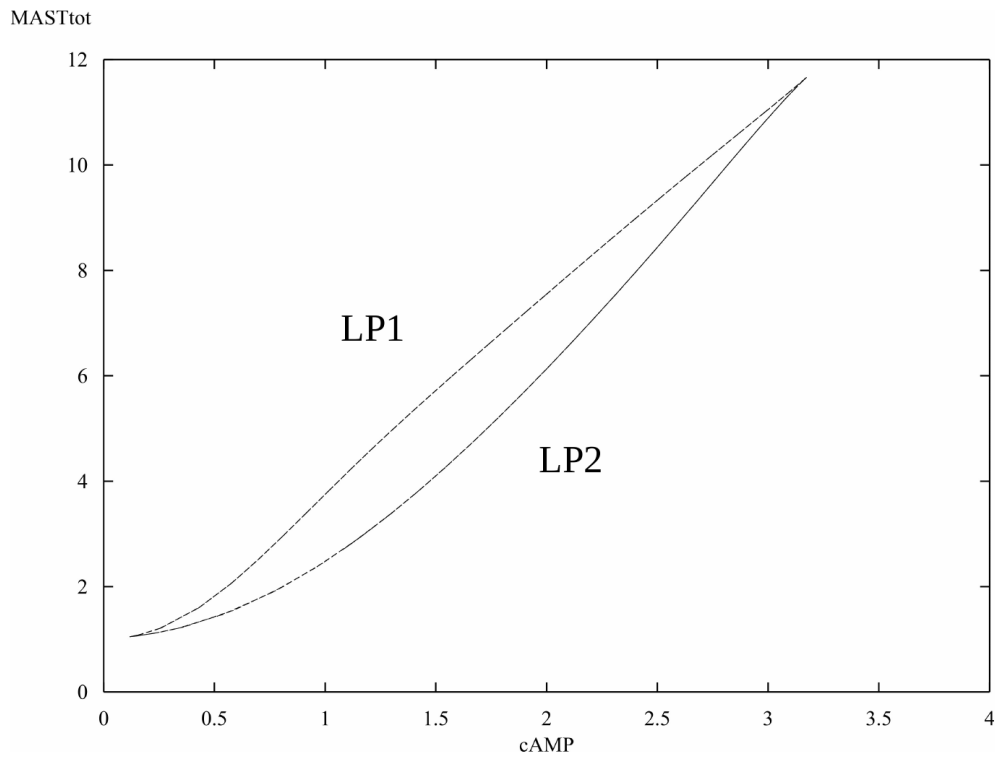

**Figure 3 – Figure Supplement 5:**

Double-parameter bifurcation diagram (cAMP and MAST3tot) showing how total concentration of MAST3 affects the two cAMP thresholds (LP: limit points shown in Figure 3 – Figure Supplement 3); and how cAMP concentration affects the two MASTtot thresholds.
