# Supplementary material for: Reciprocal regulation of ARPP-16 by PKA and MAST3 kinases provides a cAMP-regulated switch in protein phosphatase 2A inhibition
Source: eLife journal article supplement (doi:10.7554/elife.24998), 2017-06-14
Supplement: supp [file elife-24998-supp-v1.zip]

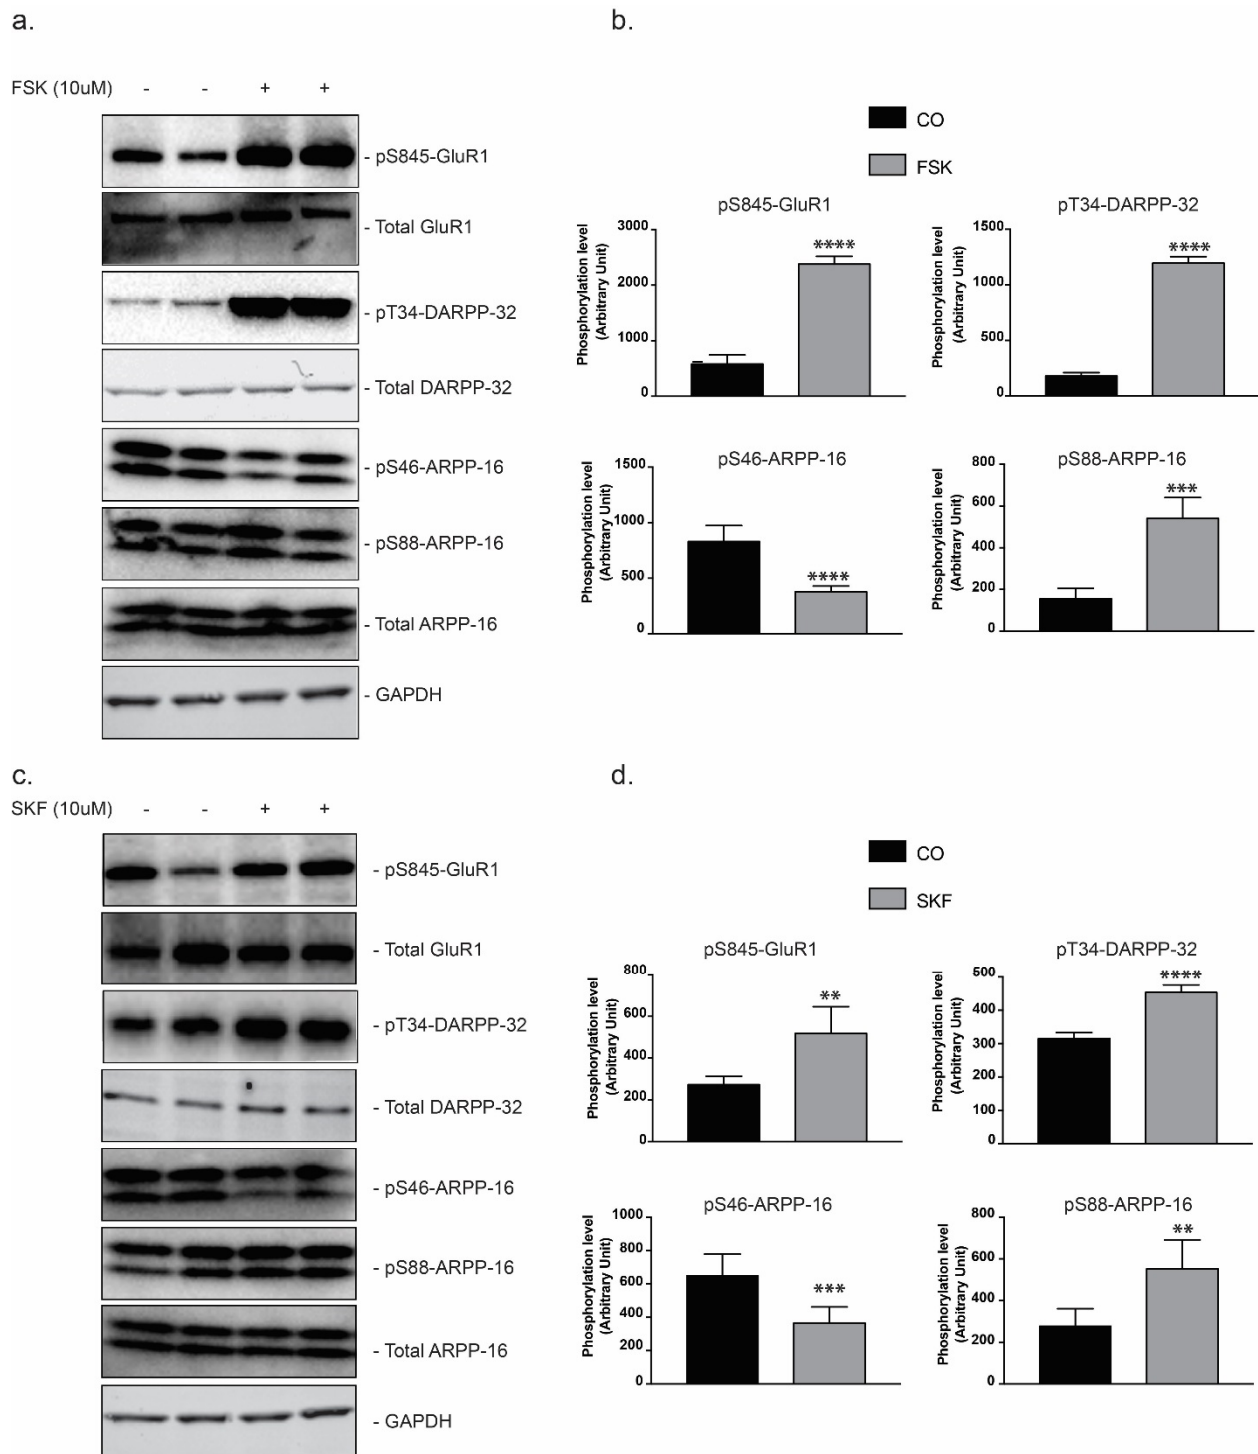

**Figure 2 – Figure Supplement 1. Regulation of ARPP-16 phosphorylation by the D1 receptor agonist, SKF-81297, in striatal slices.**

Striatal slices were treated with forskolin (10  $\mu$ M) (panel a. and b.), SKF-81297 (panel c. and d.) or DMSO (as control, panel a., b., c. and d.) for 15 min. Phosphorylation of ARPP-16 at Ser46 and Ser88 (and GluA1 at Ser845, DARPP-32 at Thr34, assayed as controls) were determined by immunoblotting using phosphorylation-state specific antibodies. Quantitation of phosphorylation was calculated for GluA1-Ser845, DARPP-32-Thr34, ARPP-16-Ser46 and ARPP-16-Ser88 and normalized to total GluA1, DARPP-32, or ARPP-16 respectively. Total proteins were also normalized to GAPDH (panel b. and d.). Graphs represent means  $\pm$  SEM for 6-8 experiments compared with control slices; \*\* $p$  = 0.0011, \*\*\* $p$  = 0.0006, \*\*\*\* $p$  < 0.0001; unpaired T test.
