# Supplementary material for: Reciprocal regulation of ARPP-16 by PKA and MAST3 kinases provides a cAMP-regulated switch in protein phosphatase 2A inhibition
Source: eLife journal article supplement (doi:10.7554/elife.24998), 2017-06-14
Supplement: supp [file elife-24998-supp-v1.zip]

**Figure 1- figure supplement 1**

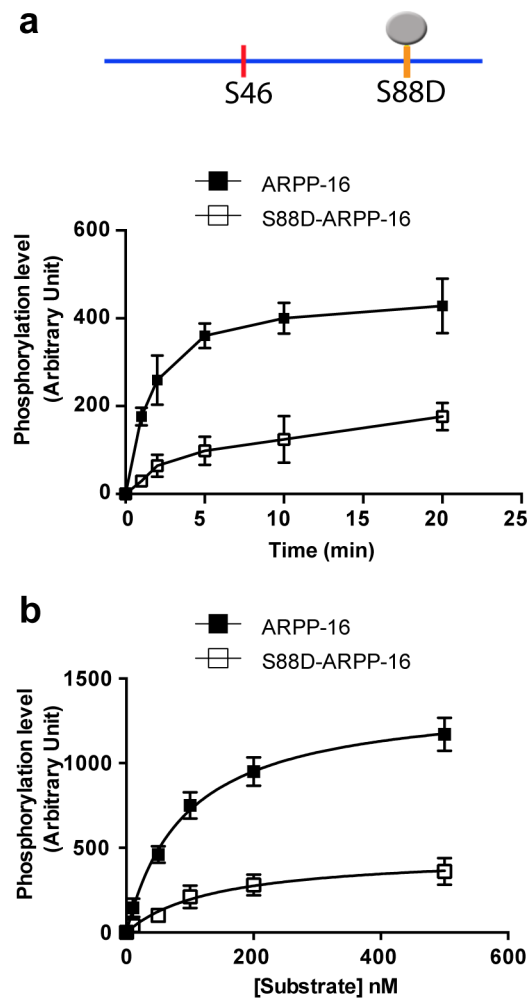

**Figure 1-Figure supplement 1. A phospho-mimetic mutation of S88-ARPP-16 attenuates the ability of MAST3 to phosphorylate S46-ARPP-16.**

**a.** Recombinant purified ARPP-16 or the phosphomimetic S88A-ARPP-16 (100 nM) were incubated with ATP- $\gamma$ - $^{32}$ P and MAST3 for various times; the proteins were separated by SDS-PAGE and phosphorylation of Ser46 was measured by autoradiography. The resulting values for phosphorylation at Ser46 site are expressed in arbitrary densitometric units (a.u.) as mean  $\pm$  SE of three independent experiments.

**b.** Assays were carried out as in a. with increasing concentrations (10-500 nM) of ARPP-16 or of the phosphomimetic S88A-ARPP-16 for 2 min.

Kinetic parameters, determined from double-reciprocal plots, of the data are presented in Table 1.
