# Supplementary material for: Reciprocal regulation of ARPP-16 by PKA and MAST3 kinases provides a cAMP-regulated switch in protein phosphatase 2A inhibition
Source: eLife journal article supplement (doi:10.7554/elife.24998), 2017-06-14
Supplement: supp [file elife-24998-supp-v1.zip]

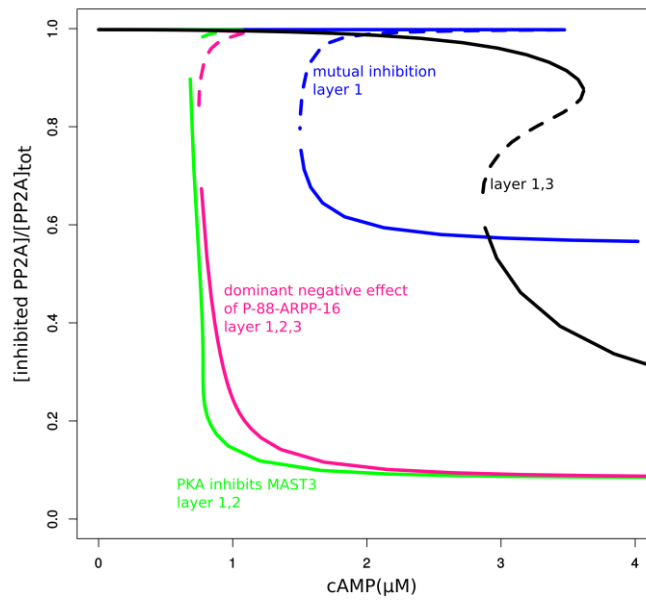

**Figure 3 – Figure Supplement 2:**

Bifurcation diagrams of inhibited PP2A under three different layers of regulation described in Figure 3 - Supplement 1.
