# Supplementary material for: Reciprocal regulation of ARPP-16 by PKA and MAST3 kinases provides a cAMP-regulated switch in protein phosphatase 2A inhibition
Source: eLife journal article supplement (doi:10.7554/elife.24998), 2017-06-14
Supplement: supp [file elife-24998-supp-v1.zip]

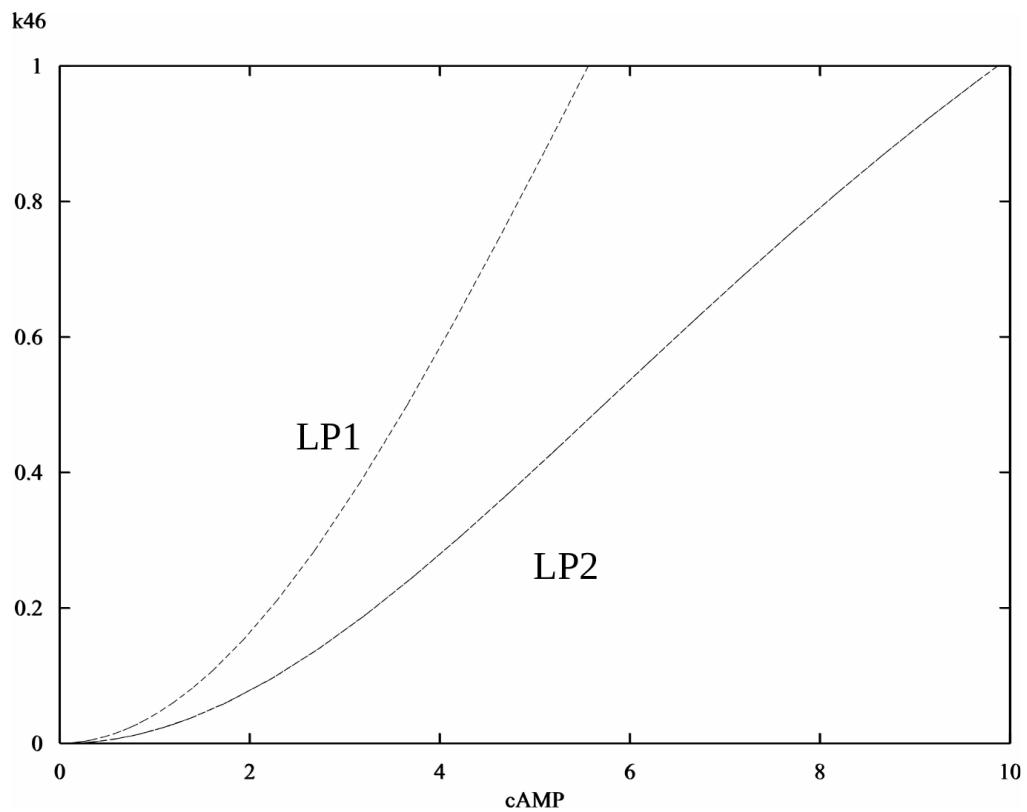

**Figure 3 – Figure Supplement 7:**

Double-parameter bifurcation diagram ( $cAMP$  and  $k_{46}$ ) showing how inhibitory effect of P-Ser46-ARPP-16 affects the two  $cAMP$  thresholds. (LP: limit points corresponding to Supplementary Figure 6).
