# Supplementary material for: Reciprocal regulation of ARPP-16 by PKA and MAST3 kinases provides a cAMP-regulated switch in protein phosphatase 2A inhibition
Source: eLife journal article supplement (doi:10.7554/elife.24998), 2017-06-14
Supplement: supp [file elife-24998-supp-v1.zip]

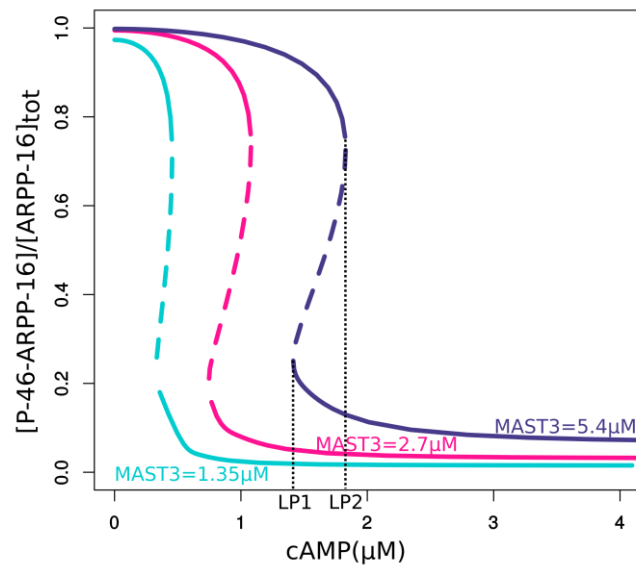

**Figure 3 – Figure Supplement 3:**

Bifurcation diagrams of P-S46-ARPP-16 under different total MAST3 concentrations. Thin black dashed lines show an example range of cAMP concentrations required for bistability. LP: limit points.
