# Supplementary material for: Reciprocal regulation of ARPP-16 by PKA and MAST3 kinases provides a cAMP-regulated switch in protein phosphatase 2A inhibition
Source: eLife. 2017 Jun 14;6:e24998. doi: 10.7554/eLife.24998 (PMC5515580; doi:10.7554/eLife.24998)
Supplement: Supplementary file 1. — The sequences of phospho-peptides identified in HA-MAST3 isolated from HEK293T cell experiments are listed in order of amino acid residue position in the protein sequence. Data from six different experiments (labelled as 1–6) are from the various digestion conditions utilized as described in the Materials and methods section. Samples from HEK293T cells incubated under control conditions (CTRL) or in the presence of forskolin (FSK) are shown. Criteria for positive phospho site identification (Primary or Alternative) includes (1) meeting PhosphoRS criteria; (2) Mascot expectation score of 0.05 or less; and peptide mass accuracy of 10 ppm or less. DOI: http://dx.doi.org/10.7554/eLife.24998.020 [file elife-24998-supp1.xlsx]

## Sheet: Sheet1
	Peptide with Expectation of <0.05 (significant of <0.05)
digestion	Experiment #	Condition	Peptide Score	Expectation	Peptide Sequence*	Modification observed	Primary Phospho site	Alternate Phospho site	Retention Time (min)	Observe m/z	Charge	Observed Peptide mass (Da)	Calculated Peptide Mass (Da)	Mass error (Da)	Mass Error (ppm)
CHIMO	4	CTRL	36.84	0.019	L.SHLEEEQPPAPESPESRAL.V	Phospho (ST)	S348	S351	44.9215	728.327	3	2181.96	2181.96	0.0018	0.8
LysC	2	FSK	37.67	0.00084	K.LTDFGLSK.I	Phospho (ST)	S512	S512	40.8506	480.725	2	959.436	959.437	-0.0007	-0.7
LysC+Tryp	3	FSK	38.31	0.0022	K.LTDFGLSK.I	Phospho (ST)	S512	S512	41.3274	480.727	2	959.44	959.437	0.0033	3.4
LysC	2	FSK	40.3	0.0013	K.IGLMSMATNLYEGHIEK.D	2 Oxidation (M); Phospho (ST)	S518	S521	43.6913	673.639	3	2017.9	2017.89	0.0071	3.5
Trypsin	5	CTRL	59.42	0.00012	R.HLGSEDDETNDEESSTEIPQFSSCSHR.F	Phospho (ST)	S680	S685	31.5667	1058.42	3	3172.25	3172.22	0.0297	9.4
Trypsin	5	CTRL	150.33	1.1e-13	K.VYSSSEFLAVQPTPTFAER.S	Phospho (ST)	S709	S710	48.3	1105.02	2	2208.03	2208.01	0.0161	7.3
Trypsin	1	CTRL	68.11	1.2e-05	K.VYSSSEFLAVQPTPTFAER.S	Phospho (ST)	S710	S709	51.2962	1105.02	2	2208.02	2208.01	0.0022	1
CHIMO	4	CTRL	48.74	0.00047	F.SKVYSSSEF.L	Phospho (ST)	S710	S711	46.4832	557.23	2	1112.45	1112.44	0.0036	3.2
Trypsin	5	FSK	106.84	2.5e-09	K.VYSSSEFLAVQPTPTFAER.S	Phospho (ST)	S710	S711	47.8333	1105.02	2	2208.02	2208.01	0.0107	4.8
Trypsin	1	CTRL	47.24	0.0014	K.VYSSSEFLAVQPTPTFAER.S	Phospho (ST)	S711	S710	49.7608	1105	2	2207.99	2208.01	-0.022	-10
LysC+Tryp	3	FSK	53.96	0.00021	K.VYSSSEFLAVQPTPTFAER.S	Phospho (ST)	S711	S713	49.9454	1105.01	2	2208	2208.01	-0.0122	-5.5
LysC+Tryp	3	CTRL	32.39	0.029	K.VYSSSEFLAVQPTPTFAER.S	Phospho (ST)	S711	S710	49.9726	1105.01	2	2208.01	2208.01	-0.008	-3.6
Trypsin	1	CTRL	34.14	0.03	K.VYSSSEFLAVQPTPTFAER.S	Phospho (ST)	S711	S710	49.8179	1105.02	2	2208.02	2208.01	0.0042	1.9
Trypsin	5	FSK	35.84	0.031	K.VYSSSEFLAVQPTPTFAER.S	Phospho (ST)	S711	S712	45.9667	737.014	3	2208.02	2208.01	0.0046	2.1
Trypsin	1	FSK	38.72	0.01	K.VYSSSEFLAVQPTPTFAER.S	Phospho (ST)	S711	S710	49.7297	1105.02	2	2208.02	2208.01	0.0058	2.6
LysC+Tryp	3	FSK	57.28	9.6e-05	K.VYSSSEFLAVQPTPTFAER.S	Phospho (ST)	S711	S710	50.28	1105.02	2	2208.02	2208.01	0.008	3.6
Trypsin	5	CTRL	56.23	0.00028	K.VYSSSEFLAVQPTPTFAER.S	Phospho (ST)	S711	S713	46.2833	1105.02	2	2208.02	2208.01	0.0103	4.7
Trypsin	5	CTRL	44.31	0.0044	K.VYSSSEFLAVQPTPTFAER.S	Phospho (ST)	S711	S709	46.1667	737.016	3	2208.03	2208.01	0.0133	6
LysC+Tryp	3	CTRL	40.22	0.005	K.VYSSSEFLAVQPTPTFAER.S	Phospho (ST)	S711	S712	50.3665	1105.02	2	2208.03	2208.01	0.0196	8.9
LysC+Tryp	3	FSK	49.1	0.0002	R.SFSEDREEGWER.S	Phospho (ST)	S726	S728	34.3279	803.815	2	1605.62	1605.61	0.0058	3.6
Trypsin	5	FSK	69.96	4.6e-06	R.SFSEDREEGWER.S	Phospho (ST)	S728	S726	26.45	803.812	2	1605.61	1605.61	-0.0012	-0.7
Trypsin	5	CTRL	46.06	0.0011	R.SFSEDREEGWER.S	Phospho (ST)	S728	S726	27.3833	803.812	2	1605.61	1605.61	-0.0007	-0.4
Trypsin	5	FSK	39.49	0.0061	R.RLSADIR.L	Phospho (ST)	S747	S747	16.35	455.727	2	909.439	909.443	-0.0039	-4.3
CHIMO	4	FSK	37.32	0.0071	Y.GRRLSADIRL.R	Phospho (ST)	S747	S752	43.0785	412.891	3	1235.65	1235.65	0.0008	0.6
LysC+Tryp	3	FSK	41.96	0.00095	R.RLSADIR.L	Phospho (ST)	S747	S745	29.1816	455.73	2	909.445	909.443	0.0015	1.6
Trypsin	5	CTRL	37.51	0.017	R.LRSWTSSGSSCQSSSSQPER.G	Phospho (ST)	S754	S756	21.3667	765.324	3	2292.95	2292.94	0.0059	2.6
Trypsin	1	FSK	119.29	6.8e-11	R.GPSPSLLNTISLDTMPK.F	Phospho (ST)	S774	S776	56.3647	925.948	2	1849.88	1849.89	-0.0086	-4.6
Trypsin	1	CTRL	90.71	4.9e-08	R.GPSPSLLNTISLDTMPK.F	Phospho (ST)	S774	S776	56.4662	925.948	2	1849.88	1849.89	-0.0083	-4.5
Trypsin	1	CTRL	68.81	7.3e-06	R.GPSPSLLNTISLDTMPK.F	Oxidation (M); Phospho (ST)	S774	S776	52.3904	933.948	2	1865.88	1865.88	-0.0032	-1.7
Trypsin	1	CTRL	75.9	1.4e-06	R.GPSPSLLNTISLDTMPK.F	Oxidation (M); Phospho (ST)	S774	S776	52.5035	933.95	2	1865.89	1865.88	0.0017	0.9
LysC+Tryp	3	FSK	34.71	0.012	R.GPSPSLLNTISLDTMPK.F	Oxidation (M); Phospho (ST)	S774	S776	52.0855	933.953	2	1865.89	1865.88	0.0069	3.7
Trypsin	1	FSK	77.69	9.3e-07	R.GPSPSLLNTISLDTMPK.F	Oxidation (M); Phospho (ST)	S774	S776	52.3721	933.953	2	1865.89	1865.88	0.0073	3.9
Trypsin	5	FSK	136.59	2.1e-12	R.GPSPSLLNTISLDTMPK.F	Phospho (ST)	S774	S776	52.6167	925.957	2	1849.9	1849.89	0.0093	5
Trypsin	1	FSK	57.46	9.8e-05	R.GPSPSLLNTISLDTMPK.F	Oxidation (M); Phospho (ST)	S774	S776	52.321	933.957	2	1865.9	1865.88	0.0156	8.4
LysC+Tryp	3	FSK	36.18	0.0087	R.GPSPSLLNTISLDTMPK.F	Oxidation (M); 2 Phospho (ST)	S774/S782	S776/S782	50.2134	973.935	2	1945.86	1945.85	0.0054	2.8
LysC+Tryp	3	CTRL	30.74	0.03	R.GPSPSLLNTISLDTMPK.F	Oxidation (M); Phospho (ST)	S776	S774	51.5159	933.951	2	1865.89	1865.88	0.0018	1
LysC+Tryp	3	FSK	31.59	0.026	R.GPSPSLLNTISLDTMPK.F	Oxidation (M); Phospho (ST)	S782	S780	49.3911	933.942	2	1865.87	1865.88	-0.0141	-7.6
Trypsin	1	CTRL	38.65	0.0078	R.GPSPSLLNTISLDTMPK.F	Oxidation (M); Phospho (ST)	S782	S780	49.7784	933.943	2	1865.87	1865.88	-0.0132	-7.1
Trypsin	1	FSK	62	3.7e-05	R.GPSPSLLNTISLDTMPK.F	Phospho (ST)	S782	S780	53.214	925.947	2	1849.88	1849.89	-0.0107	-5.8
LysC+Tryp	3	FSK	56.58	9.2e-05	R.GPSPSLLNTISLDTMPK.F	Phospho (ST)	S782	S780	52.03	925.947	2	1849.88	1849.89	-0.0092	-5
LysC+Tryp	3	CTRL	59.55	4.5e-05	R.GPSPSLLNTISLDTMPK.F	Phospho (ST)	S782	S780	51.9713	925.949	2	1849.88	1849.89	-0.0063	-3.4
Trypsin	1	FSK	31.66	0.038	R.GPSPSLLNTISLDTMPK.F	Oxidation (M); Phospho (ST)	S782	S780	49.6666	933.947	2	1865.88	1865.88	-0.0043	-2.3
CHIMO	4	FSK	39.64	0.0068	L.NTISLDTMPKF.A	Oxidation (M); Phospho (ST)	S782	S780	49.7345	681.805	2	1361.59	1361.59	0.0009	0.7
Trypsin	1	FSK	78.94	7.3e-07	R.GPSPSLLNTISLDTMPK.F	Phospho (ST)	S782	S780	53.1225	925.957	2	1849.9	1849.89	0.01	5.4
LysC+Tryp	3	CTRL	72.27	2.2e-06	R.GPSPSLLNTISLDTMPK.F	Phospho (ST)	S782	S780	52.1972	925.961	2	1849.91	1849.89	0.0175	9.5
Trypsin	1	FSK	89.16	5.5e-08	K.FAFSSEDEGVGPGPAGPK.R	Phospho (ST)	S793	S792	42.384	914.884	2	1827.75	1827.77	-0.0181	-9.9
LysC	6	FSK	42.22	0.00057	K.FAFSSEDEGVGPGPAGPK.R	Phospho (ST)	S793	S792	56.2652	914.893	2	1827.77	1827.77	0.0005	0.3
LysC	2	FSK	82.45	5.7e-08	K.FAFSSEDEGVGPGPAGPK.R	Phospho (ST)	S793	S792	41.8154	914.894	2	1827.77	1827.77	0.0023	1.3
LysC	2	CTRL	116.23	2.4e-11	K.FAFSSEDEGVGPGPAGPK.R	Phospho (ST)	S793	S792	41.7509	914.895	2	1827.77	1827.77	0.0031	1.7
LysC	2	FSK	114.35	3.7e-11	K.FAFSSEDEGVGPGPAGPK.R	Phospho (ST)	S793	S792	41.8659	914.895	2	1827.78	1827.77	0.0037	2
LysC	2	CTRL	95.08	3.1e-09	K.FAFSSEDEGVGPGPAGPK.R	Phospho (ST)	S793	S792	41.8373	914.895	2	1827.78	1827.77	0.0048	2.6
Trypsin	1	CTRL	85.88	1.4e-07	K.FAFSSEDEGVGPGPAGPK.R	Phospho (ST)	S793	S792	42.3735	914.9	2	1827.79	1827.77	0.0137	7.5
CHIMO	4	FSK	61.52	3.7e-05	L.SADTAALSHARL.R	Phospho (ST)	S839	S835	41.2023	646.804	2	1291.59	1291.59	0.0008	0.6
LysC+Tryp	3	CTRL	24.67	0.045	R.SLSSNPSSR.D	Phospho (ST)	S931	S930	10.4173	507.715	2	1013.42	1013.42	-0.0018	-1.8
LysC+Tryp	3	FSK	28.1	0.024	R.LGTGGTHEVK.Q	Phospho (ST)	T628	T631	19.8609	539.75	2	1077.48	1077.49	-0.0007	-0.6
LysC+Tryp	3	FSK	48.11	0.00056	R.GPSPSLLNTISLDTMPK.F	Oxidation (M); Phospho (ST)	T780	T782	47.1878	933.953	2	1865.89	1865.88	0.007	3.8
	* = "." indicate the cut site
	Supplementary File 1
	The sequences of phospho-peptides identified in HA-MAST3 isolated from HEK cell experiments
	are listed in order of amino acid residue position in the protein sequence. Data from six different
	experiments (labelled as 1-6) are from the various digestion conditions utilized as described in the
	Methods section. Samples from HEK cells incubated under control conditions (CTRL) or in the
	presence of forskolin (FSK) are shown. Criteria for positive phospho site identification (Primary or
	Alternative) includes 1) meeting PhosphoRS criteria; 2) Mascot expectation score of 0.05 or less;
	and peptide mass accuracy of 10 ppm or less
